# Supplementary material for: Oral History, Community, and Displacement: Imagining Memories in Post-Apartheid South Africa
Source: Royal Society of Chemistry journal article supplement (doi:10.1039/c8sm00631h), 2012-09-01
Supplement: c8sm00631h1.pdf [file c8sm00631h1.pdf]

## Many-body Depletion Forces of Colloids in a Polydisperse Polymer Dispersant in the Long-chain Limit

Huy S. Nguyen<sup>1</sup>, Jan Forsman<sup>2</sup>, and Clifford E. Woodward<sup>1</sup>

<sup>1</sup>School of Physical, Environmental and Mathematical Science, University of New South Wales, Canberra at the Australian Defence Force Academy, Canberra, ACT 2600, Australia.

<sup>2</sup>Department of Theoretical Chemistry Lund University, PO Box S-22100 Lund Sweden

### Supplemental Material

#### *Derivation of the Many-Body Depletion Interaction for Large $R_g$*

Eq.(8) (in the main text) with the specified boundary conditions is analogous to an electrostatic problem in the presence of a screening electrolyte (with a Debye length equal to  $R_g$ ) and can be solved using standard Green's function methods,<sup>1</sup>

$$\hat{g}(r_i; \Gamma) = 1 + \oint_{S_i} d\hat{s}_i G_o(|r_i - R_S \hat{s}_i|) \Lambda_i(\hat{s}_i) + \sum_{j \neq i}^N \oint_{S_j} d\hat{s}_j G_o(|r_i - R_{ij} - R_S \hat{s}_j|) \Lambda_j(\hat{s}_j) \quad (\text{S1})$$

where,  $r_i$  is the vector with origin at the  $i^{\text{th}}$  sphere,  $\hat{s}_j$  is the unit vector centered at the  $j^{\text{th}}$  sphere, which is integrated over all orientations and  $R_{ij}$  is the vector pointing from sphere  $i$  to sphere  $j$ .  $G_o(r)$  is a Green's function for the Helmholtz equation in free space

$$\nabla^2 \hat{G}_0(|\mathbf{r} - \mathbf{r}'|) - \lambda^2 \hat{G}_0(|\mathbf{r} - \mathbf{r}'|) = \delta(\mathbf{r} - \mathbf{r}') \quad (\text{S2})$$

where  $\lambda = 1/R_g$  and

$$\hat{G}_0(\mathbf{r}) = \exp(i\pi/4) (-\lambda r)/4\pi\lambda r \quad (\text{S3})$$

which propagates chain density fluctuations in the fluid with the expected correlation length of  $R_g$ . The surface "polarizations",  $\Lambda_j$ , describe the effect of the fixed spheres on the fluid, and are determined self-consistently so as to satisfy Eq.(9). Using the following expansions in spherical harmonics,  $Y_m^l(\hat{r})$ ,

$$\hat{g}(r) = \sum_{l=0}^{\infty} \sum_{m=-l}^l \hat{g}_m^l(r) Y_m^l(\hat{r}) \quad (\text{S4})$$

$$\Lambda_i(s) = \sum_{l=0}^{\infty} \sum_{m=-l}^l \Lambda_{im}^l(r) Y_m^l(\hat{r}) \quad (\text{S5})$$

we can substitute into Eq.(S1) to obtain the following

$$\hat{g}_m^l(r_i) = \sqrt{4\pi} \delta_0^l + \Gamma_{lm}(i) k_l(\lambda r_i) + i_l(\lambda r_i) \sum_{j \neq i}^N \sum_{l'} \sum_{m'=-l'}^{l'} G_{lm,l'm'}(\lambda R_{ij}) \Gamma_{l'm'}^{l'}(j) \quad (\text{S6a})$$

where

$$\Gamma_{lm}(x) = \lambda \Lambda_m^l(x) i_l(\lambda R_S) \quad (\text{S6b})$$

$$G_{lm,l'm'}(\lambda R) = \sum_{LM} k_L(\lambda R) Q_{ll'L} C(l'l'L, 000) C(l'l'L, mm'M) Y_M^L(\hat{R}) \quad (\text{S6c})$$

$\delta_0^l$  is the Kronecker delta function,  $C(l_1 l_2 l, m_1 m_2 m)$  is a Clebsch–Gordan coefficient,

$$Q_{l_1 l_2 l} = (-1)^{l_2} \sqrt{4\pi} \left[ \frac{(2l_1 + 1)(2l_2 + 1)}{2l + 1} \right]^{\frac{1}{2}} \quad (\text{S6d})$$

and  $k_l(x)$  and  $i_l(x)$  are the modified spherical Bessel functions of the first and second kind respectively. Eqs (S6 a-d) were obtained using 1- and 2-centre expansions for the Yukawa function.<sup>1,2</sup>

For large  $R_g$  we make the approximation that all but  $l=0$  terms can be set to zero. As we discuss later, this follows from the fact that  $\hat{G}_0(\mathbf{r}) \sim R_g/r$  and correlations become exceptionally long-ranged making the surface polarizations less sensitive to the specific configurations of the spheres in the local environment. As a consequence, the surface polarization is slowly varying over the surface of a particle. Thus, we make a *spherical approximation* to obtain,<sup>2</sup>

$$\hat{g}_0^0(r_i) = \sqrt{4\pi} + \Gamma_{00}(i) k_0(\lambda r_i) + i_0(\lambda r_i) \sum_{j \neq i}^N k_0(\lambda R_{ij}) \Gamma_{00}(j) \quad (\text{S7})$$

Furthermore, given that the local environment about each sphere becomes relatively insensitive to the specific configuration of the surrounding spheres within the distance  $R_g$ , the surface polarizations  $\Gamma_{00}(i)$  (for typical particle configurations) are only expected to vary on a length scale of  $R_g$ , which allows us to make the following *local approximation*,<sup>2</sup>

$$\hat{g}_0^0(r_i) = \sqrt{4\pi} + \Gamma_{00}(i)k_0(\lambda r_i) + \Gamma_{00}(i) i_0(\lambda r_i) \sum_{j \neq i}^N k_0(\lambda R_{ij}) \quad (\text{S8})$$

Eq.(S8) can be solved at the sphere surfaces, using the boundary condition, Eq.(9) in the main text to give,

$$\Gamma_{00}(i) = -\sqrt{4\pi} \left( k_0(\sigma) + i_0(\sigma) \sum_{j \neq i}^N k_0(\lambda R_{ij}) \right)^{-1} \quad (\text{S9})$$

where we have defined  $\sigma = \lambda R_S$  and  $k_0(x) = \exp^{[0]}(-x)/x$ .

Using Eq.(5) in the main text we can re-express the volume integral in Eq.(6) in terms of  $\nabla^2 \hat{g}(r; \Gamma)$  and convert this to a surface integral of  $\nabla \hat{g}(r; \Gamma)$  at each particle surface. Assuming only spherical ( $l = 0$ ) terms are non-zero, the radial derivative of  $\hat{g}_0^0(r_i)$  at the sphere surfaces can be obtained from Eq.(S8). Finally using Eq.(S9) we obtain the following (large  $R_g$ ) form for the total POMF, which is equivalent to Eqs.(7-9).

$$\omega(\Gamma) = N\omega^{(1)} - 4\pi R_g^3 \Phi_{chain} \sum_{i=1}^N \frac{\sigma^2 e^{2\sigma} \sum_{j \neq i}^N k_0(\lambda R_{ij})}{1 + \frac{(e^{2\sigma} - 1)}{2} \sum_{k \neq i}^N k_0(\lambda R_{ik})} \quad (\text{S10})$$

where the 1-body insertion term is

$$\beta\omega^{(1)} = 4\pi R_g^3 \Phi_{chain} \left\{ \sigma + \sigma^2 + \sigma^3/3 \right\} \quad (\text{S11})$$

The second term in Eq.(S10) is the total many-body contribution to the depletion interaction.

The so-called spherical and local approximations leading to Eq.(S9) and hence Eq.(S10) can be justified, by showing that the effective Hamiltonian Eq.(S10) between the particles lead to self-consistent solutions for  $\Gamma_{00}(i)$ , as given by Eq.(S9). To do this we rewrite the many-body term after subtracting the 1-body contribution in Eq.(S9),

$$-4\pi R_g^2 R_S \Phi_{chain} \sum_{i=1}^N \sum_{j \neq i}^N k_0(\lambda R_{ij}) \left[ \frac{R_g^3}{e^{-2\sigma}/\sigma + \frac{(1 - e^{-2\sigma})}{2\sigma} R_g^3 \sum_{k \neq i}^N k_0(\lambda R_{ik})} \right] \quad (\text{S12})$$

where

$$k_0(\lambda R) = R_g^{-3} k_0(\lambda R) \quad (\text{S13})$$

We shall assume that bulk conditions give a fixed value for  $R_g^2 \Phi_{chain}$  for all  $R_g$ . The function  $k_0(\lambda R)$  has the form of a weak long-ranged Kac pair potential.<sup>3</sup> A system that interacts via such a potential (in addition to a hard sphere interaction) is known to have a mean-field *generalized* van der Waals form in the limit where the range of the potential (in our case  $R_g$ ) becomes infinite.<sup>4-7</sup> We conjecture that the particles interacting via the many-body potential Eq.(S12) behave similarly to one with pair potential, Eq.(S13). This is because the term in square brackets in Eq.(S12) will remain finite as  $R_g$  grows. For a system with a pair potential given by Eq.(S13) at large  $R_g$ , sums of the type

$\sum_{k \neq i}^N k_0(\lambda R_{ik})$  can be replaced by their mean-field form (for particle configurations that contribute significantly to the partition function). That is,

$$\sum_{k \neq i}^N k_0(\lambda R_{ik}) \approx 4\pi\rho_S \int_{2R_S}^{\infty} dR R^2 k_0(\lambda R) = 4\pi\rho_S e^{-2\sigma}(1 + 2\sigma) \quad (\text{S14})$$

Considering Eq.(S12) we find that replacing the sum in the denominator with the RHS of Eq.(S14) means that the term in square brackets approaches a finite constant, in the limit  $R_g \rightarrow \infty$ , and the Hamiltonian does indeed have a Kac form of the type shown in Eq.(S13). This is consistent with our initial conjecture that the many-body potential produces the same mean-field thermodynamics as the pair potential, Eq.(S13). While this is not a rigorous proof, but merely a plausibility argument, this hypothesis is strongly supported by the very good agreement between the mean-field theory and simulations using the complete many-body potential, as shown in the main text, see Figure 1(b).

The argument leading to Eq.(S14), means that the local approximation, which gives rise to Eq.(S9) provides an accurate self-consistent solution for the set of

$\{\Gamma_{00}(i) \mid i = 1, N\}$ , for large  $R_g$ , as all sums,  $\sum_{k \neq i}^N k_0(\lambda R_{ik})$ , are approximately equal over a length scale of  $R_g$  for the important particle configurations. To show that no higher moments ( $l > 0$ ) need be considered, we note that the contributions to the surface polarizations at particle  $i$ , due to all other particles  $j$  is given by the second term on the RHS of Eq.(S1)

$$\sum_{j \neq i}^N \oint_{S_j} d\hat{s}_j G_o(|r_i - R_{ij} - R_S \hat{s}_j|) \Lambda_j(\hat{s}_j) \approx \Lambda_0^0(i) \sum_{j \neq i}^N k_o(\lambda |r_i - R_{ij}|) / 4\pi \quad (\text{S15})$$

where the RHS of Eq.(S15) is the contribution due to monopole terms and the local approximation has been used, also recall  $\Gamma_{00}(x) = \lambda \Lambda_0^0(x) i_0(\lambda R_S)$ . In the limit of large  $R_g$ , our previous arguments imply that the sum on the RHS is essentially independent of almost all configurations of importance and therefore is constant over the surface of the

sphere at  $i$ . This implies the asymmetric contributions generated by the monopole terms are small and all  $\Gamma_{lm}(x)$  ( $l>0$ ) can be set to zero.

## References

1. C. E. Woodward and J. Forsman, *J. Chem. Phys.*, 2010, **133**, 154902
2. C. E. Woodward and J. Forsman, *Langmuir*, 2015, **31**, 22
3. M. Kac, G. E. Uhlenbeck and P. C. Hemmer, *J. Math. Phys.*, 1963, **4**, 216.
4. G. E. Uhlenbeck, P. C. Hemmer and M. Kac, *Math. Phys.*, 1963, **4**, 229.
5. P. C. Hemmer, M. Kac and G. E. Uhlenbeck, *Math. Phys.*, 1964, **5**, 60.
6. P. C. Hemmer, *Math. Phys.*, 1964, **5**, 75
7. L. Lebowitz and O. Penrose, *Math. Phys.*, 1966, **6**, 1282
